# Supplementary material
Source: Springer Nature journal article supplement (https://www.springermedizin.de/resource/supplementary/12889_2007_979_MOESM1_ESM.pdf/9503240)

**Male**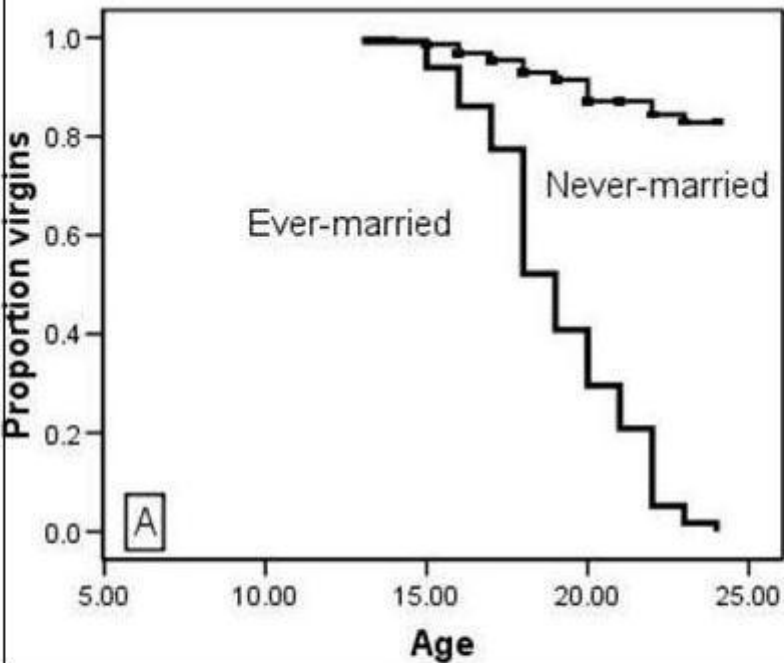**Female**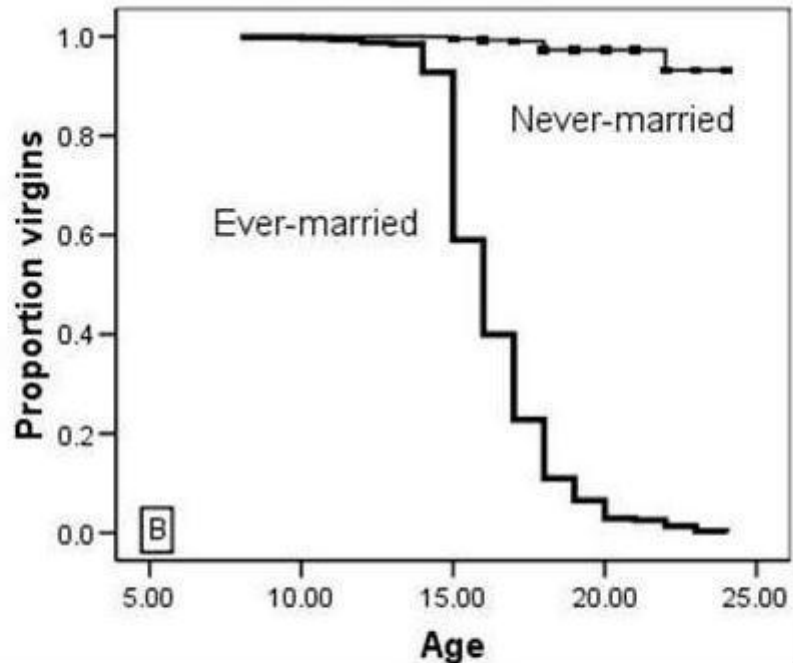

Supplement: MOESM1 [file 9503240]
